# Supplementary material for: Intermittent Exposure to Aflatoxin B1 Did Not Affect Neurobehavioral Parameters and Biochemical Markers of Oxidative Stress
Source: MDPI journal article supplement (doi:10.3390/brainsci13030386), 2023-02-23
Supplement: s1 [file s1]

## Supplementary Material

### Tables

**Table S1.** Effect of intermittent administration of AFB<sub>1</sub> (250 µg/kg b.w., i.g.) or DMSO 2% (10 mL/kg b.w., i.g.) on the organ weight of animals.

| Organ            | Relative weight to body weight |             |                |
|------------------|--------------------------------|-------------|----------------|
|                  | <i>DMSO</i>                    | <i>AFB1</i> | <i>P value</i> |
| <i>Brain</i>     | 0.97 ± 0.02                    | 0.97 ± 0.01 | 0.85           |
| <i>Heart</i>     | 0.44 ± 0.01                    | 0.44 ± 0.01 | 0.84           |
| <i>Kidneys</i>   | 1.03 ± 0.02                    | 1.02 ± 0.01 | 0.85           |
| <i>Liver</i>     | 5.75 ± 0.19                    | 5.58 ± 0.15 | 0.50           |
| <i>Lungs</i>     | 0.72 ± 0.01                    | 0.74 ± 0.02 | 0.69           |
| <i>Spleen</i>    | 0.32 ± 0.02                    | 0.35 ± 0.02 | 0.38           |
| <i>Testicles</i> | 0.99 ± 0.03                    | 0.96 ± 0.03 | 0.57           |

Data are reported mean ± S.E.M. for n = 8 animals in each group. Statistical evaluation was performed by unpaired Student's t test (p>0.05).

**Table S2.** Effect of intermittent administration of AFB<sub>I</sub> (250 µg/kg b.w., i.g.) or DMSO 2% (10 mL/kg b.w., i.g.) on relative organ weight compared to the brain weight.

| Organ            | Relative weight to brain weight |               |                |
|------------------|---------------------------------|---------------|----------------|
|                  | <i>DMSO</i>                     | <i>AFBI</i>   | <i>P value</i> |
| <i>Heart</i>     | 45.45 ± 1.71                    | 45.59 ± 1.36  | 0.94           |
| <i>Kidneys</i>   | 106.7 ± 2.53                    | 105.5 ± 1.63  | 0.67           |
| <i>Liver</i>     | 592.9 ± 13.75                   | 572.8 ± 15.76 | 0.35           |
| <i>Lungs</i>     | 75.42 ± 2.65                    | 75.99 ± 2.64  | 0.88           |
| <i>Spleen</i>    | 33.42 ± 2.77                    | 36.24 ± 2.79  | 0.48           |
| <i>Testicles</i> | 102.2 ± 3.68                    | 98.39 ± 3.05  | 0.44           |

Data are reported mean ± S.E.M. for n = 8 animals in each group. Statistical evaluation was performed by unpaired Student's t test (p>0.05).

**Table S3.** Effect of intermittent administration of AFB<sub>1</sub> (250 µg/kg b.w., i.g.) or DMSO 2% (10 mL/kg b.w., i.g.) on Na<sup>+</sup>, K<sup>+</sup>-ATPase activity in cerebral cortex.

|                                             | DMSO         | AFB1         | P value | t(df)      |
|---------------------------------------------|--------------|--------------|---------|------------|
| <b>Na<sup>+</sup>, K<sup>+</sup>-ATPase</b> |              |              |         |            |
| <b>(Δ min/mg protein)</b>                   |              |              |         |            |
| <i>Isoform α1</i>                           | 50.85 ± 3.55 | 63.35 ± 8.17 | 0.18    | t(14)=1.40 |
| <i>Isoform α2/α3</i>                        | 21.74 ± 5.08 | 25.19 ± 2.49 | 0.55    | t(14)=0.60 |
| <i>Total</i>                                | 72.59 ± 8.31 | 88.54 ± 9.89 | 0.23    | t(14)=1.23 |

Data are reported mean ± S.E.M. for n = 8 animals in each group. Statistical evaluation was performed by unpaired Student's t test (p>0.05).

## Figures

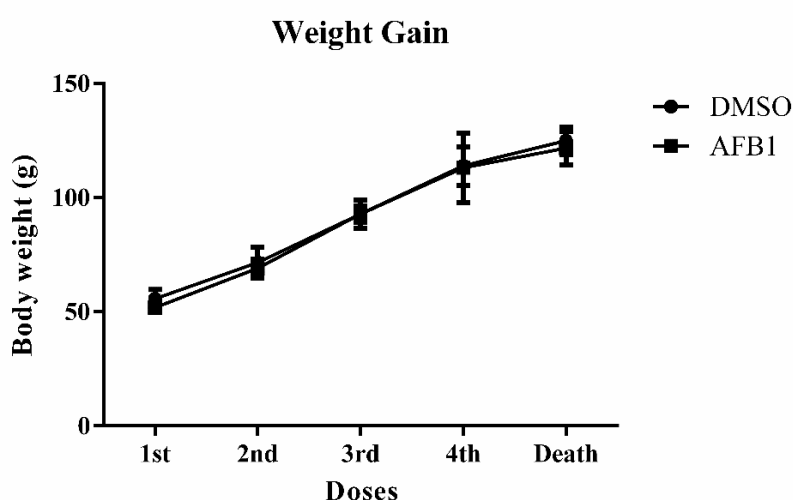

**Figure S1.** Effect of intermittent administration of AFB<sub>1</sub> (250 µg/kg b.w., i.g.) or DMSO 2% (10 mL/kg b.w., i.g.) on body weight gain. Data are reported mean ± S.E.M. for n = 8 animals in each group. Statistical evaluation was performed by unpaired Student's t test (p>0.05).
